# Supplementary material for: Genome-Wide Identification and Analysis of the Growth-Regulating Factor Family in Zanthoxylum armatum DC and Functional Analysis of ZaGRF6 in Leaf Size and Longevity Regulation
Source: MDPI journal article supplement (doi:10.3390/ijms23169043), 2022-08-12
Supplement: s1 [file s1]

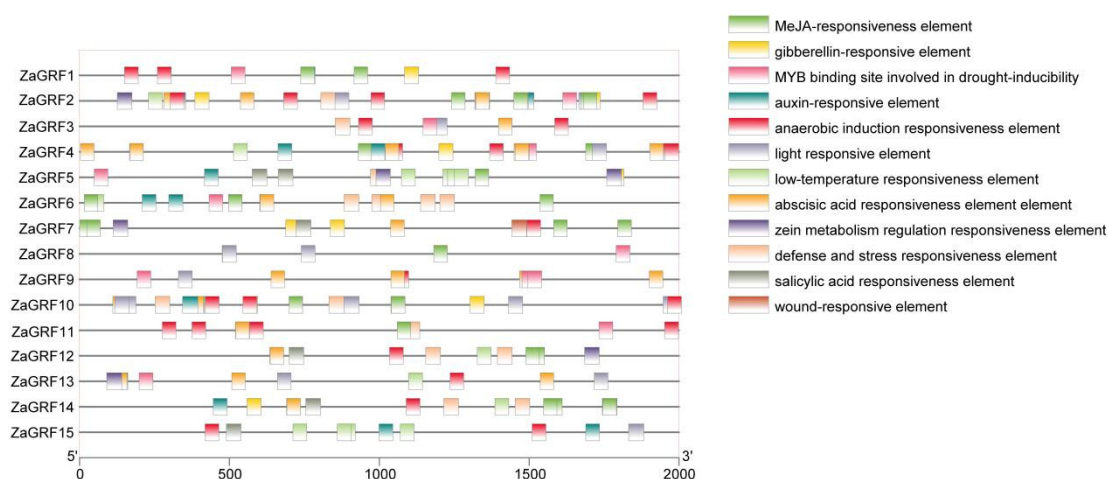

**Figure S1.** Cis-acting elements in the promoters of the *GRF* gene family.

**Table S1.** Primers for the qRT-PCR investigation of *ZaGRF* genes.

| Genes          | Primer sequence (5' to 3') |                       | Amplicon size (bp) |
|----------------|----------------------------|-----------------------|--------------------|
|                | Forward primer             | Reverse primer        |                    |
| <i>ZaActin</i> | GTGAGCCACACAG-TACCCAT      | GGTGAAAGAGTACCCACGCT  | 129                |
| <i>ZaGRF1</i>  | ACTCAGTTGGTAC-GCGTGAG      | TGTAACACGCCGTGCACTAT  | 221                |
| <i>ZaGRF3</i>  | CTCACACTCGAAGTG-CAGGT      | GGCAA-GCCAAATGGATGCAA | 208                |
| <i>ZaGRF4</i>  | GAGACACCAGCAG-CATGAGT      | AGATGACCCAGATGAGGGCT  | 115                |
| <i>ZaGRF5</i>  | GGAAGGTGCAGTTGAC-GAGA      | AGCACTTTCCCAGCCACAAT  | 150                |
| <i>ZaGRF6</i>  | GGAAGGAGGGCATCAC-CATT      | TGCATGTGGCGTTCACAGTA  | 296                |
| <i>ZaGRF7</i>  | AA-GCTTTCAGAACCCGCCTT      | AGTTGTGTGTACGCCCCTGT  | 259                |
| <i>ZaGRF8</i>  | TGCATTCAATTTGGCTTGCCC      | CGGCCCCGATTTATATGCCT  | 196                |
| <i>ZaGRF15</i> | ACAAGCCCAC-CGAATCAACA      | TGCTGGTGTTTTGAGCCAT   | 209                |
| <i>NbActin</i> | ACTGAA-GCGCCTCTTAACCC      | AGACGGAGAATGG-CATGTGG | 218                |
| <i>NbARR4</i>  | GTCCGACGAG-TCATCAACCC      | GAGATGAAGTGGATGGCGGT  | 122                |
| <i>NbCRF2</i>  | AACGGAAGTGTTAG-TGGCGT      | GTACACGTCGCAGTGGATCT  | 208                |
| <i>NbCKX1</i>  | AGCAGCAA-GAGGTCATGGTC      | CGAGGGTAGCACGAA-GAACA | 206                |

|               |                           |                           |     |
|---------------|---------------------------|---------------------------|-----|
| <i>NbGLK1</i> | AGCTTCGGATCTT-<br>GGTTCGG | GCAATTCTGGCGTCCAATCC      | 203 |
| <i>NbPORB</i> | CTGGAAACGTAC-<br>CGCCAAAG | CGGGATAGAGGGAC-<br>GCAAAG | 213 |

**Table S2.** Subcellular localization and secondary structure prediction of ZaGRF proteins.

| Gene           | Subcellular localization | Alpha helix | Extended strand | Random coil |
|----------------|--------------------------|-------------|-----------------|-------------|
| <i>ZaGRF1</i>  | Nucleus                  | 17.18       | 10.42           | 69.01       |
| <i>ZaGRF2</i>  | Extracellular matrix     | 12.01       | 19.88           | 59.45       |
| <i>ZaGRF3</i>  | Nucleus                  | 15.46       | 12.65           | 67.47       |
| <i>ZaGRF4</i>  | Nucleus                  | 19.79       | 9.38            | 69.01       |
| <i>ZaGRF5</i>  | Nucleus                  | 19.72       | 15.85           | 58.10       |
| <i>ZaGRF6</i>  | Nucleus                  | 12.61       | 10.81           | 72.37       |
| <i>ZaGRF7</i>  | Nucleus                  | 22.18       | 11.60           | 61.43       |
| <i>ZaGRF8</i>  | Nucleus                  | 18.87       | 9.20            | 69.02       |
| <i>ZaGRF9</i>  | Nucleus                  | 18.75       | 10.68           | 68.75       |
| <i>ZaGRF10</i> | Nucleus                  | 19.16       | 12.07           | 66.93       |
| <i>ZaGRF11</i> | Nucleus                  | 19.18       | 8.95            | 70.08       |
| <i>ZaGRF12</i> | Extracellular matrix     | 16.46       | 11.39           | 70.04       |
| <i>ZaGRF13</i> | Nucleus                  | 12.13       | 12.13           | 72.06       |
| <i>ZaGRF14</i> | Extracellular matrix     | 20.08       | 10.74           | 66.20       |
| <i>ZaGRF15</i> | Extracellular matrix     | 21.41       | 14.98           | 58.72       |

**Table S3.** The members of GRFs in *Z. armatum*, *C. sinensis*, *A. thaliana* and *O. sativa*.

| Genes          | Gene ID       | Genes         | Gene ID         | Genes          | Gene ID         |
|----------------|---------------|---------------|-----------------|----------------|-----------------|
| <i>ZaGRF1</i>  | Zardc16696.t1 | <i>AtGRF1</i> | AT2G22840       | <i>CsGRF7</i>  | Cs_ont_7g017420 |
| <i>ZaGRF2</i>  | Zardc21503.t1 | <i>AtGRF2</i> | AT4G37740       | <i>OsGRF1</i>  | LOC_Os02g53690  |
| <i>ZaGRF3</i>  | Zardc26531.t1 | <i>AtGRF3</i> | AT2G36400       | <i>OsGRF2</i>  | LOC_Os06g10310  |
| <i>ZaGRF4</i>  | Zardc29111.t1 | <i>AtGRF4</i> | AT3G52910       | <i>OsGRF3</i>  | LOC_Os04g51190  |
| <i>ZaGRF5</i>  | Zardc30654.t1 | <i>AtGRF5</i> | AT3G13960       | <i>OsGRF4</i>  | LOC_Os02g47280  |
| <i>ZaGRF6</i>  | Zardc37188.t1 | <i>AtGRF6</i> | AT2G06200       | <i>OsGRF5</i>  | LOC_Os06g02560  |
| <i>ZaGRF7</i>  | Zardc37898.t1 | <i>AtGRF7</i> | AT5G53660       | <i>OsGRF6</i>  | LOC_Os03g51970  |
| <i>ZaGRF8</i>  | Zardc42395.t1 | <i>AtGRF8</i> | AT4G24150       | <i>OsGRF7</i>  | LOC_Os12g29980  |
| <i>ZaGRF9</i>  | Zardc45509.t1 | <i>AtGRF9</i> | AT2G45480       | <i>OsGRF8</i>  | LOC_Os12g29980  |
| <i>ZaGRF10</i> | Zardc49103.t1 | <i>CsGRF1</i> | Cs_ont_1g019360 | <i>OsGRF9</i>  | LOC_Os03g47140  |
| <i>ZaGRF11</i> | Zardc50859.t1 | <i>CsGRF2</i> | Cs_ont_1g023250 | <i>OsGRF10</i> | LOC_Os02g45570  |
| <i>ZaGRF12</i> | Zardc52135.t1 | <i>CsGRF3</i> | Cs_ont_3g022280 | <i>OsGRF11</i> | LOC_Os07g28430  |
| <i>ZaGRF13</i> | Zardc52753.t1 | <i>CsGRF4</i> | Cs_ont_5g030480 | <i>OsGRF12</i> | LOC_Os04g48510  |
| <i>ZaGRF14</i> | Zardc53033.t1 | <i>CsGRF5</i> | Cs_ont_5g050440 |                |                 |
| <i>ZaGRF15</i> | Zardc54515.t1 | <i>CsGRF6</i> | Cs_ont_6g007580 |                |                 |

**Table S4.** The gene pairs among *Z. armatum*, *A. thaliana*, *C. sinensis* and *O. sativa*.

| Gene pairs     |                 | Species |
|----------------|-----------------|---------|
| <i>Za</i> GRF3 | <i>Za</i> GRF8  | Za-Za   |
| <i>Za</i> GRF7 | Zardc38469.t1   | Za-Za   |
| <i>Za</i> GRF2 | <i>At</i> GRF9  | Za-At   |
| <i>Za</i> GRF3 | <i>At</i> GRF1  | Za-At   |
| <i>Za</i> GRF8 | <i>At</i> GRF1  | Za-At   |
| <i>Za</i> GRF5 | <i>At</i> GRF6  | Za-At   |
| <i>Za</i> GRF5 | <i>At</i> GRF5  | Za-At   |
| <i>Za</i> GRF3 | <i>At</i> GRF2  | Za-At   |
| <i>Za</i> GRF8 | <i>At</i> GRF2  | Za-At   |
| <i>Za</i> GRF5 | <i>Os</i> GRF1  | Za-Os   |
| <i>Za</i> GRF2 | Cs_ont_5g002060 | Za-Cs   |
| <i>Za</i> GRF2 | Cs_ont_5g041030 | Za-Cs   |
| <i>Za</i> GRF3 | CsGRF2          | Za-Cs   |
| <i>Za</i> GRF5 | Cs_ont_1g019360 | Za-Cs   |
| <i>Za</i> GRF8 | CsGRF2          | Za-Cs   |
